# Supplementary material for: Effects of Environmental Heat Load on Endocannabinoid System Components in Adipose Tissue of High Yielding Dairy Cows
Source: MDPI journal article supplement (doi:10.3390/ani12060795), 2022-03-21

CB1 protein winter vs summer (Fig 1)

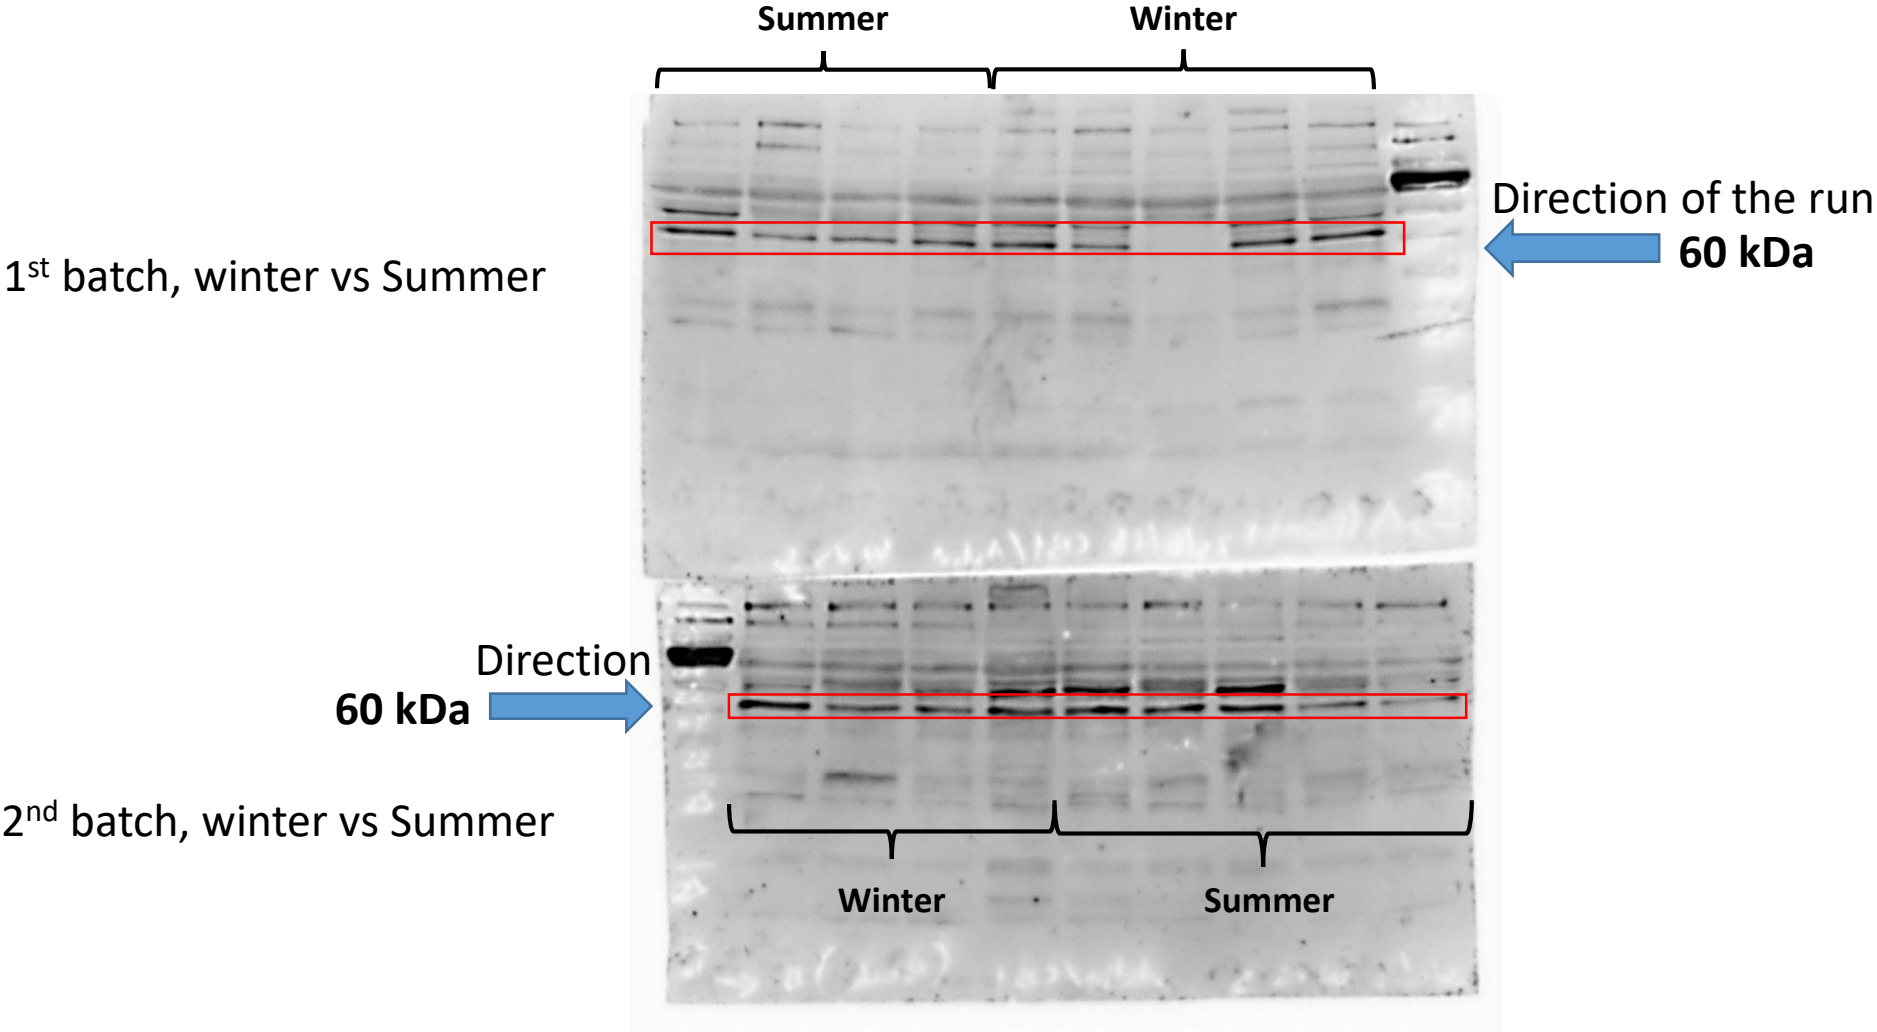



FAAH protein winter vs. summer (Fig 1)

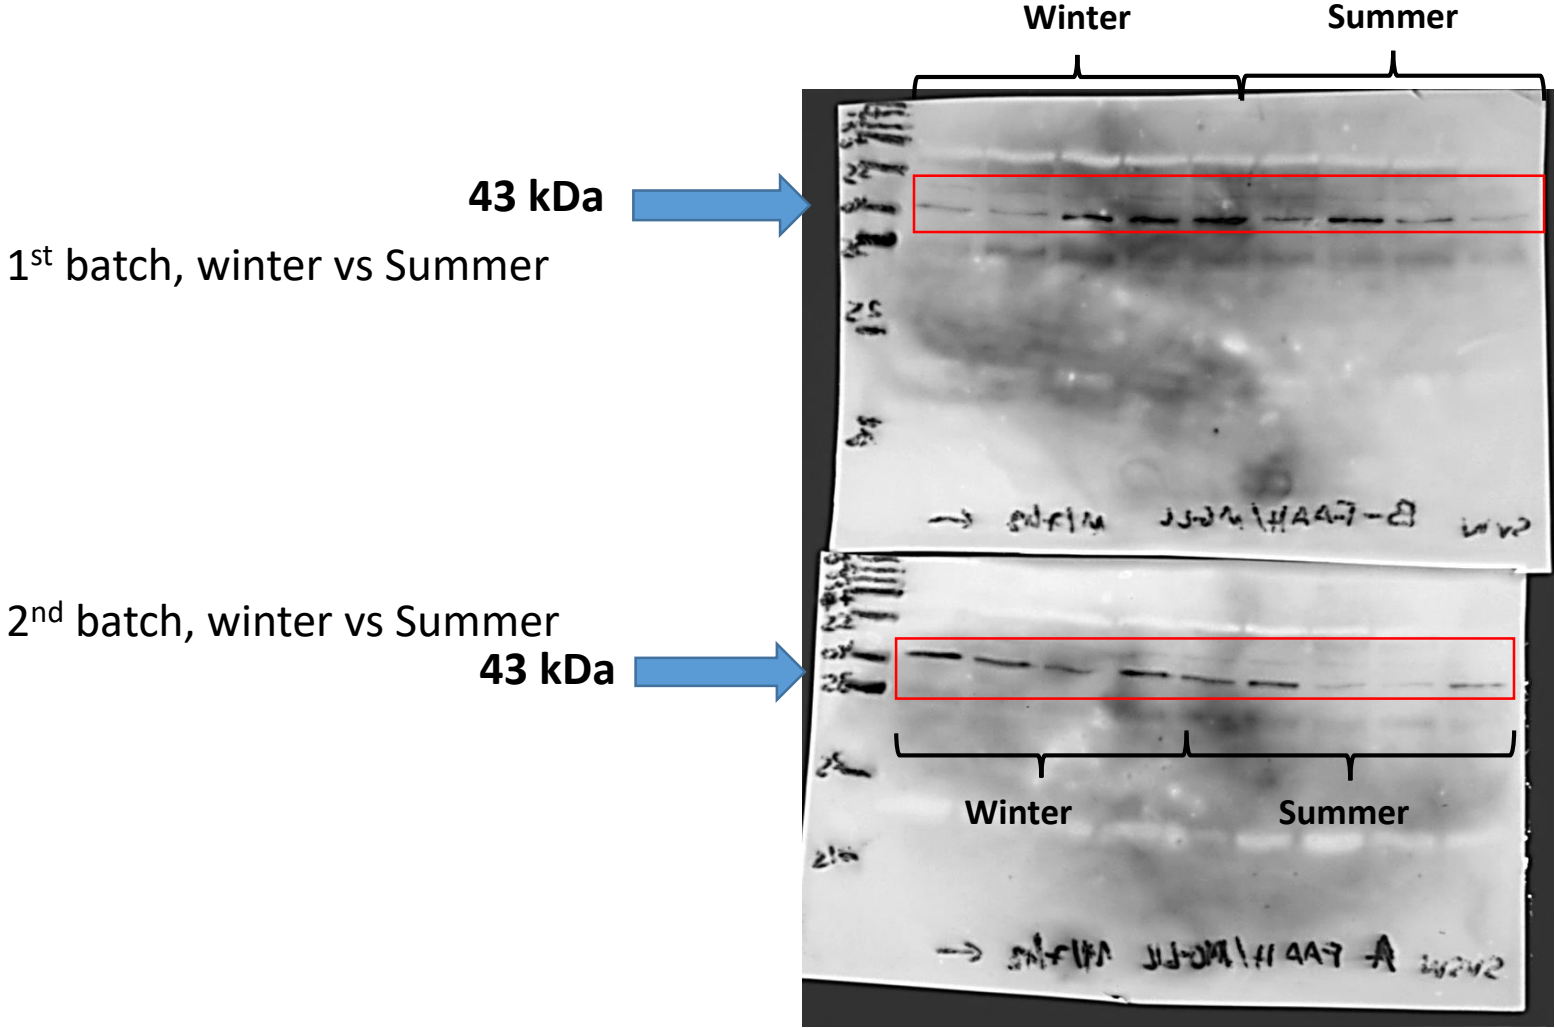

MGLL protein Winter vs. Summer (Fig 1)

1<sup>st</sup> batch, winter vs Summer

35 kDa →

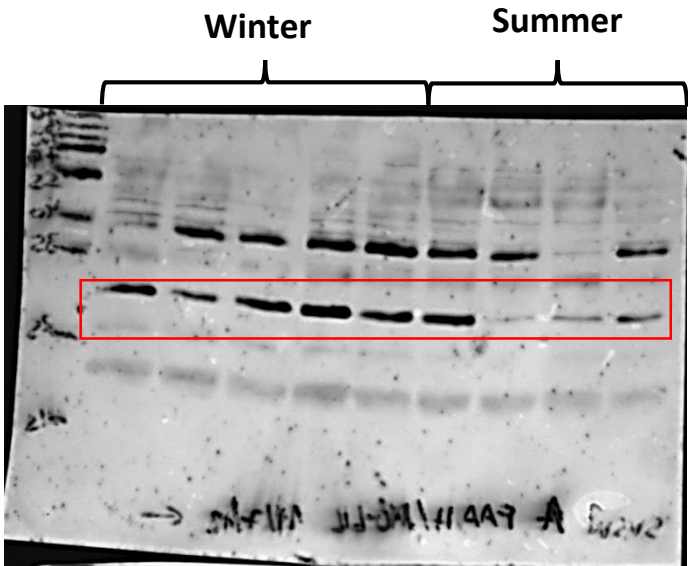

2<sup>nd</sup> batch, winter vs Summer

35 kDa →

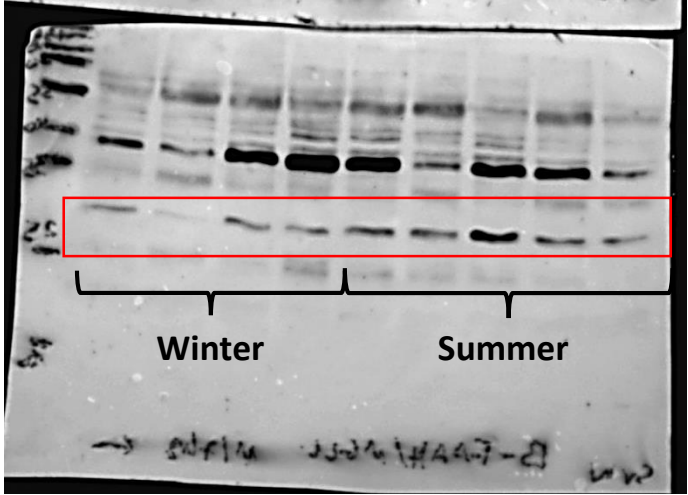

# PPARα protein winter vs. summer (Fig 1)

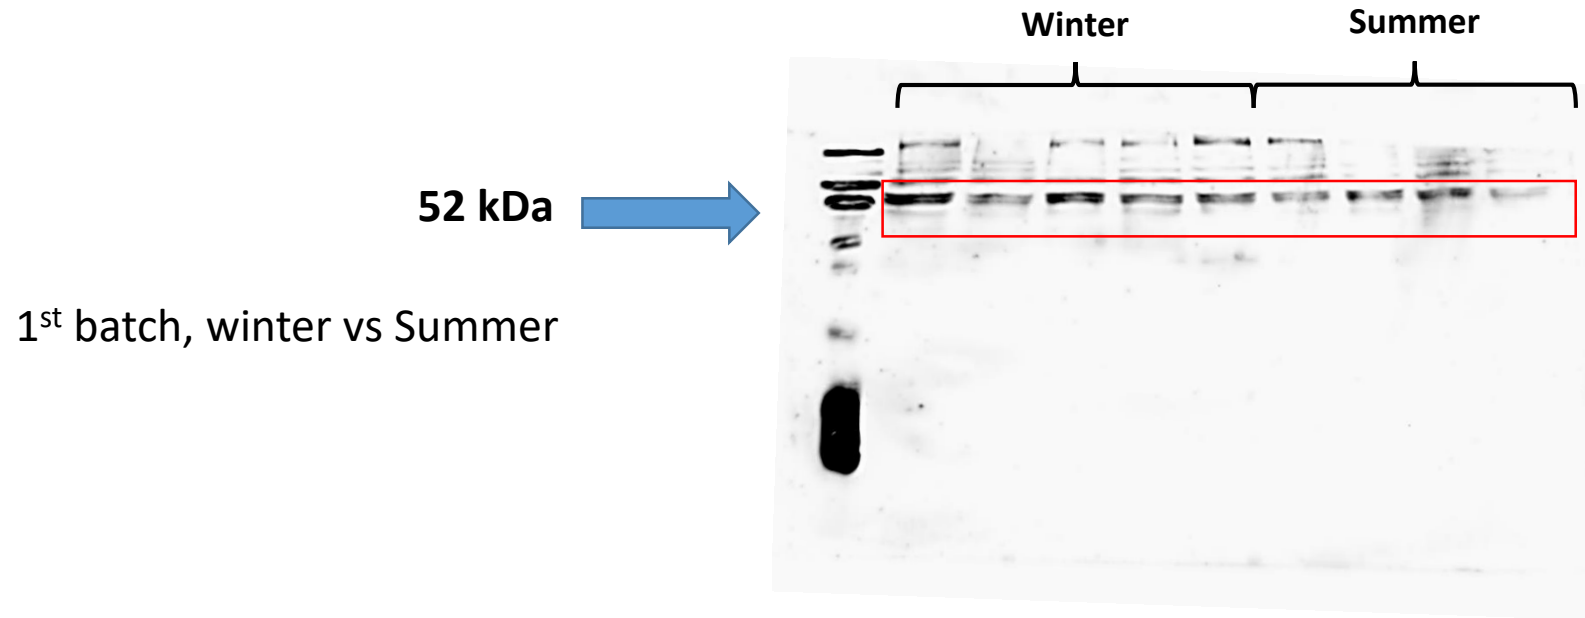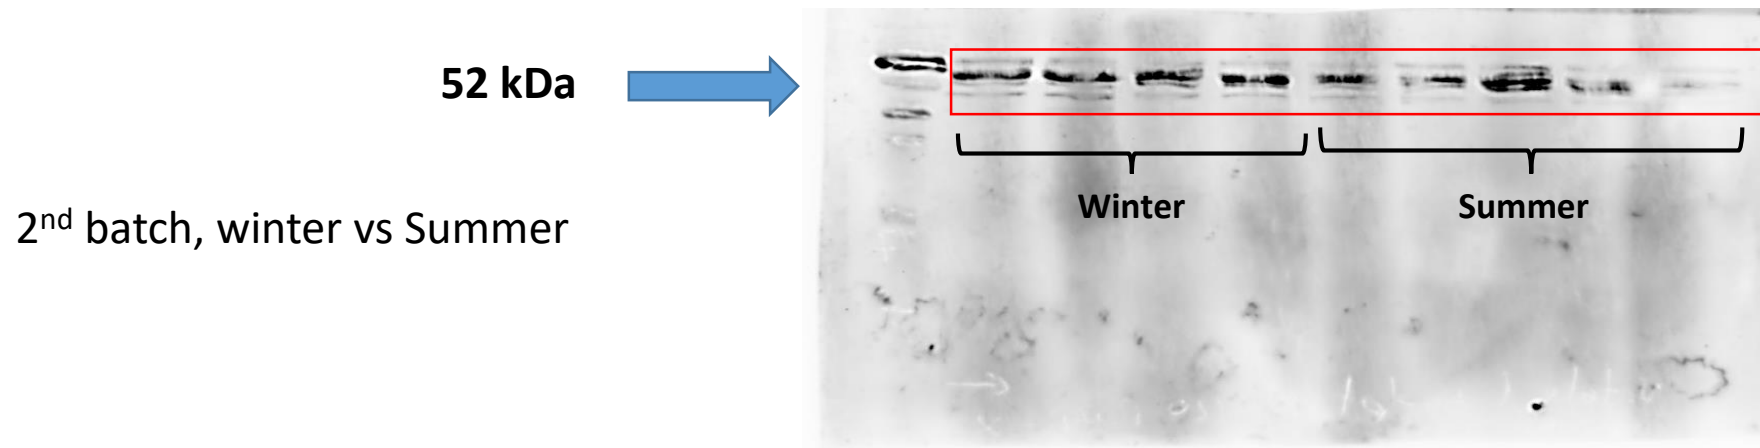

TNF $\alpha$  protein winter vs summer (Fig 2)

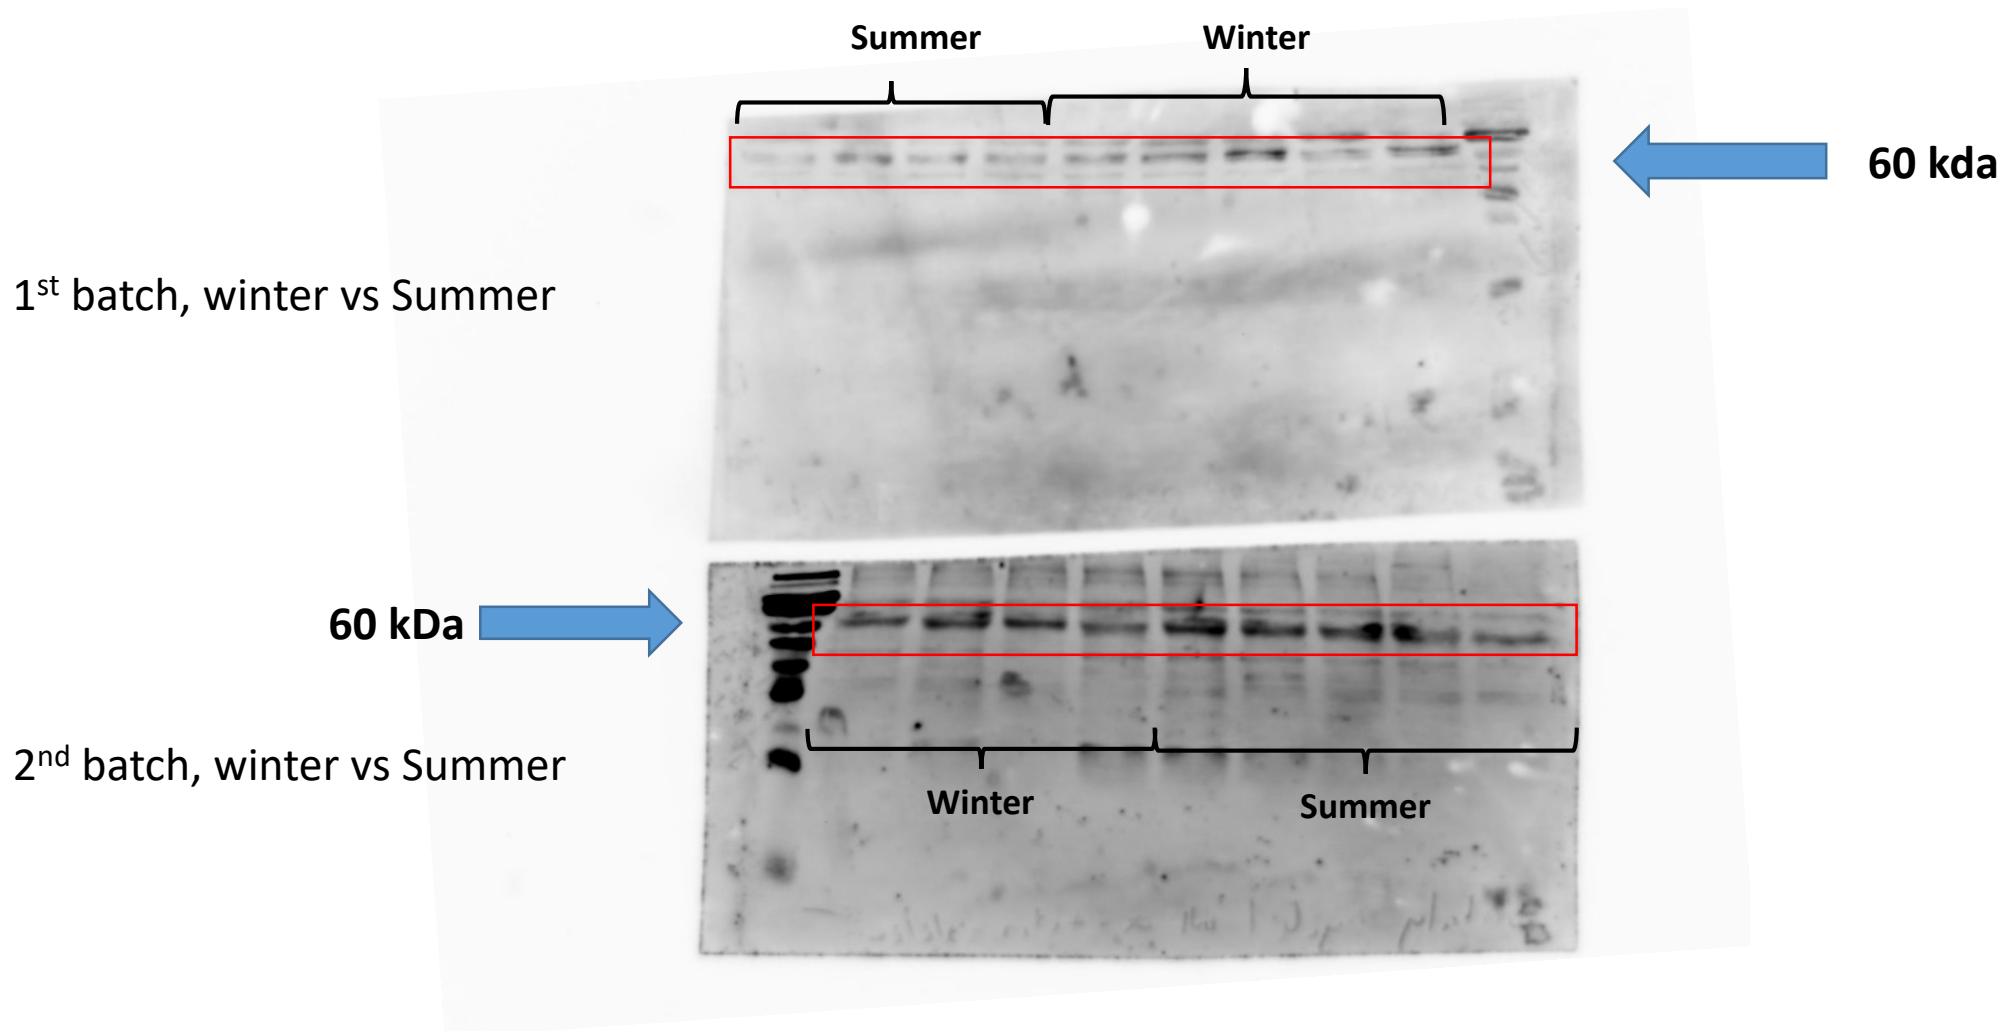

# TRPV1 protein winter vs summer (Fig 2)

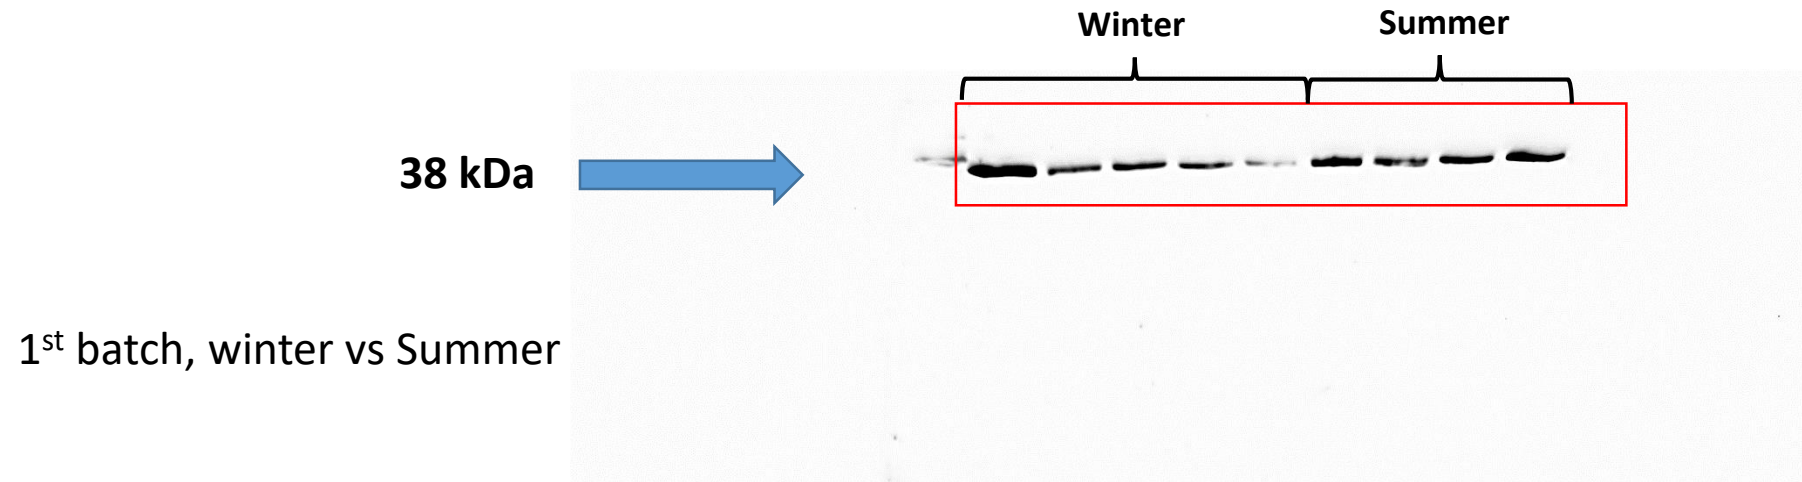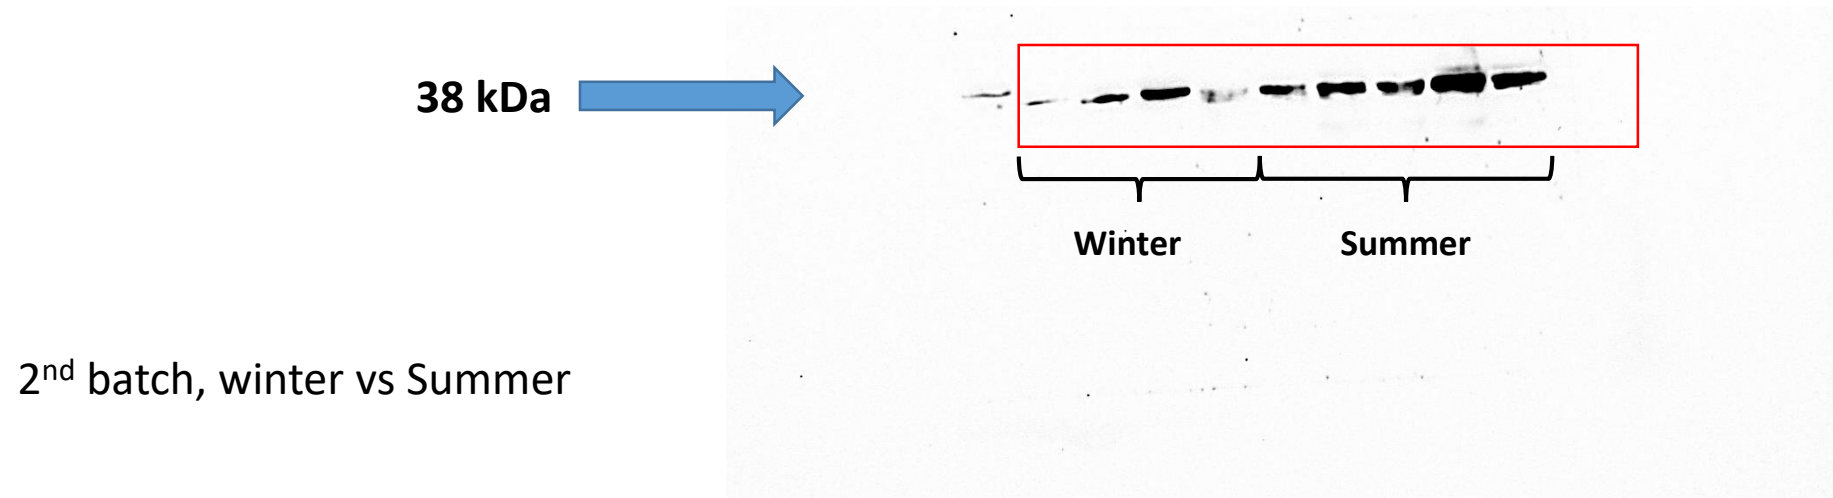

Actin protein- number 1 winter vs summer (fig 1)

45 kDa-shown in Fig 1

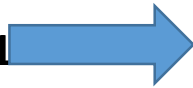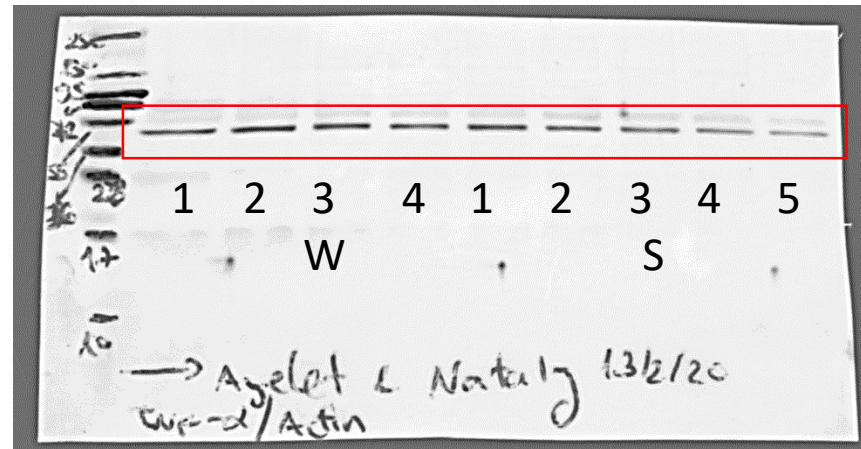



Actin protein- number 2 winter vs. summer (shown in fig 2)

45 kDa →  
1<sup>st</sup> batch, winter vs Summer

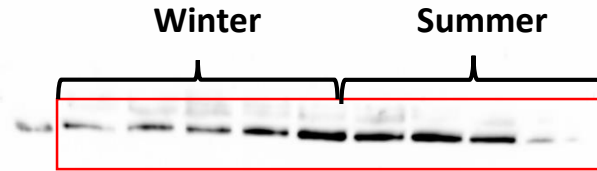

45 kDa →  
2<sup>nd</sup> batch, winter vs Summer

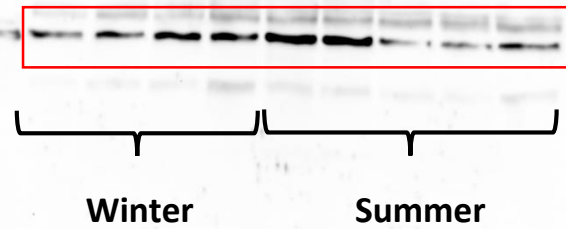

Actin protein- number 3 winter vs summer

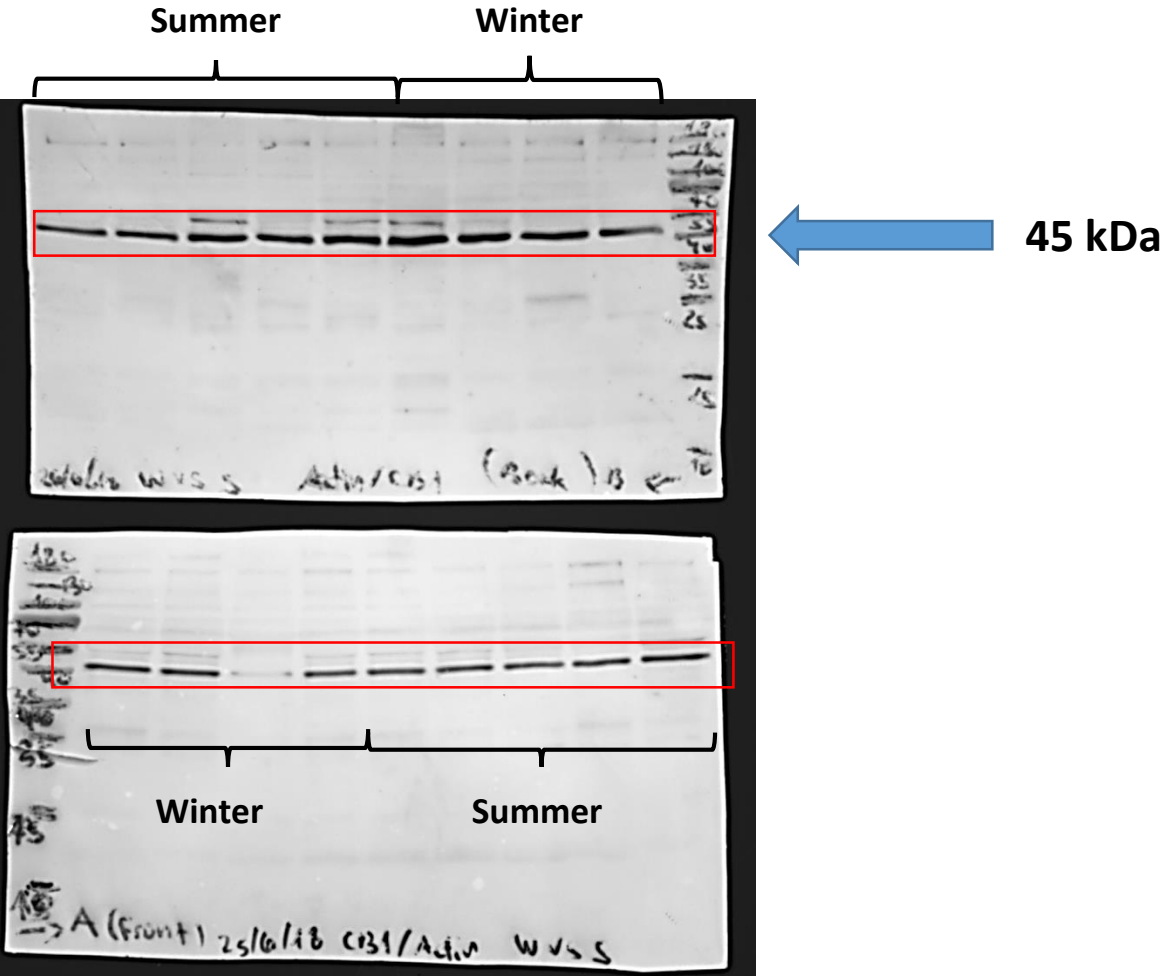

CB1 protein in Cooled vs. not cooled (2 runs)- shown in fig 3

60 kDa →

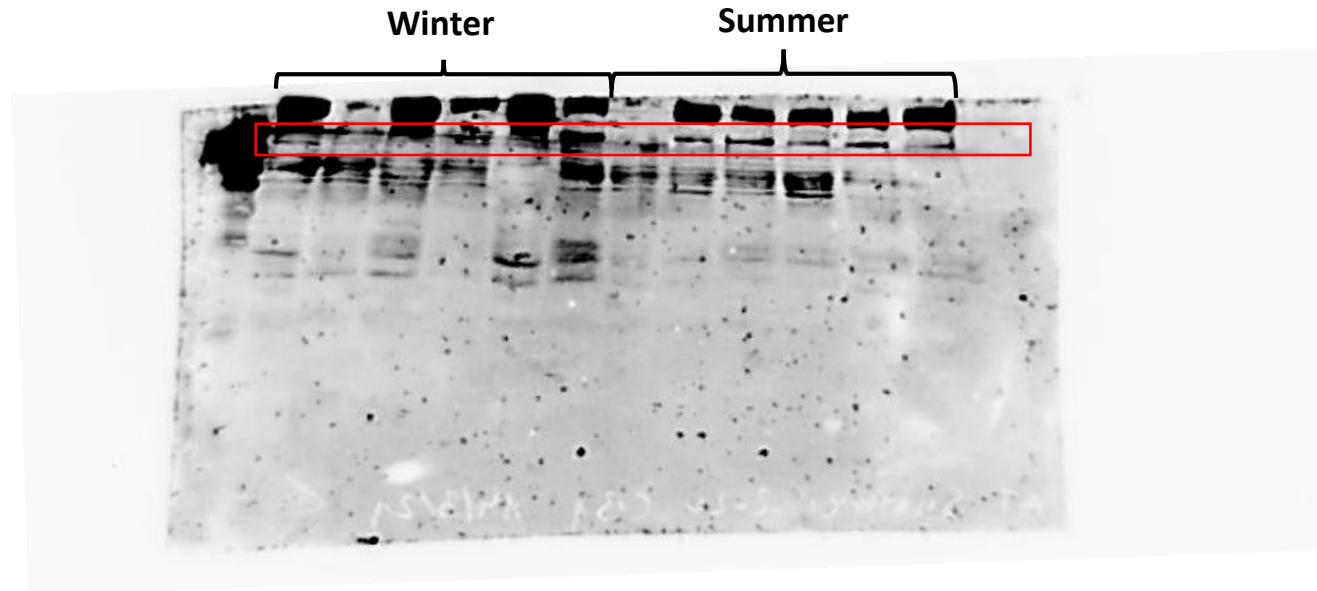

Second run. This was done with another marker in the middle. We presented the above blot even though the background is murky

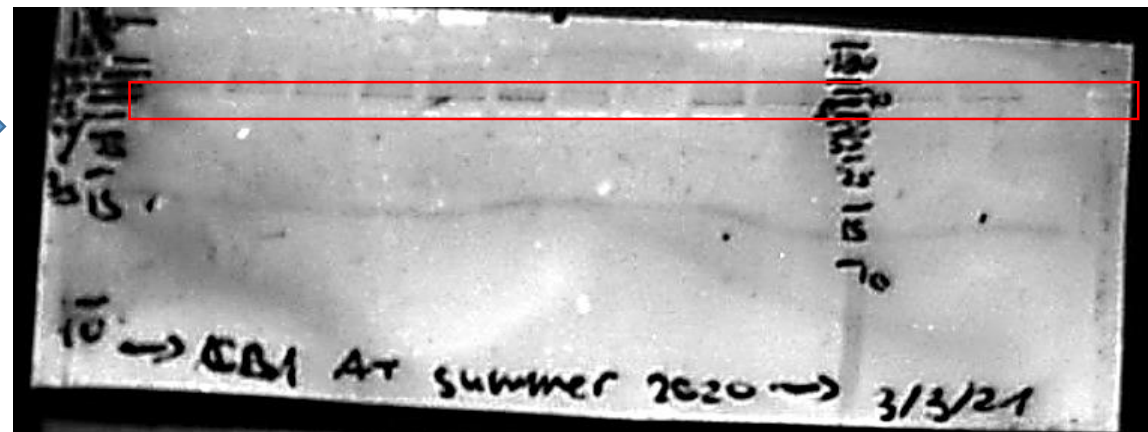

CB2 Cooled vs. not cooled (not shown)

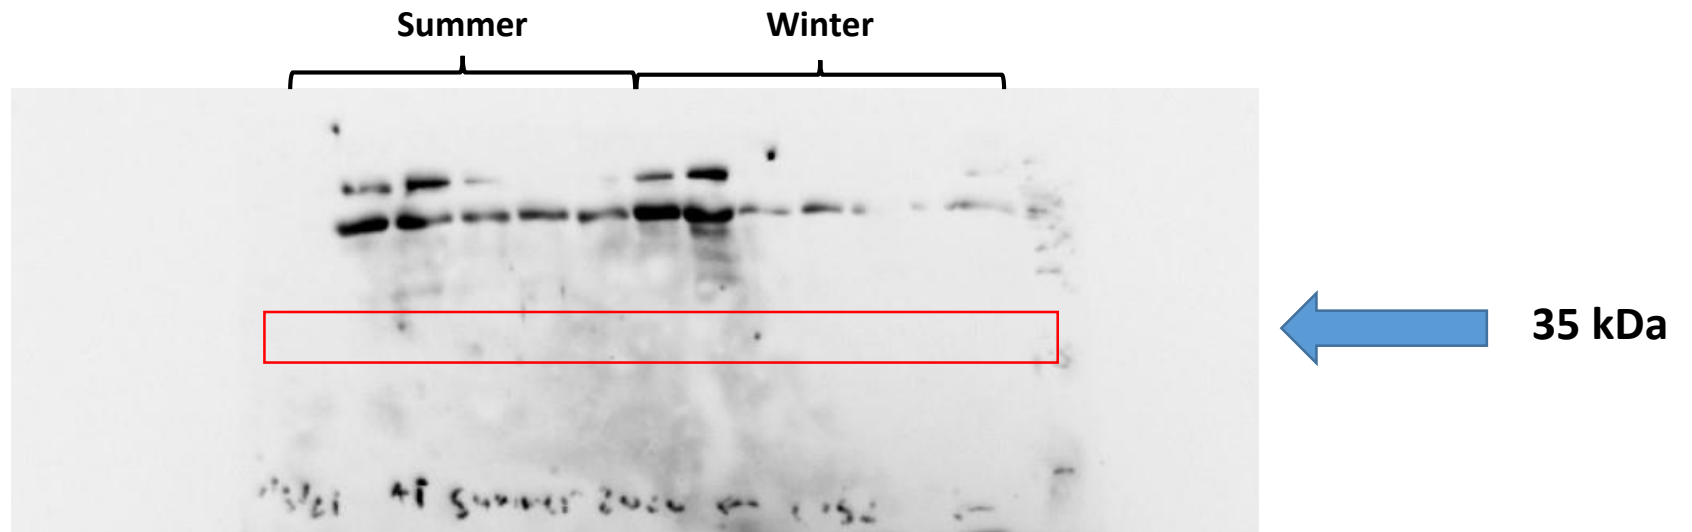

FAAH and MGLL proteins Cooled vs. not cooled (shown in Fig 3)

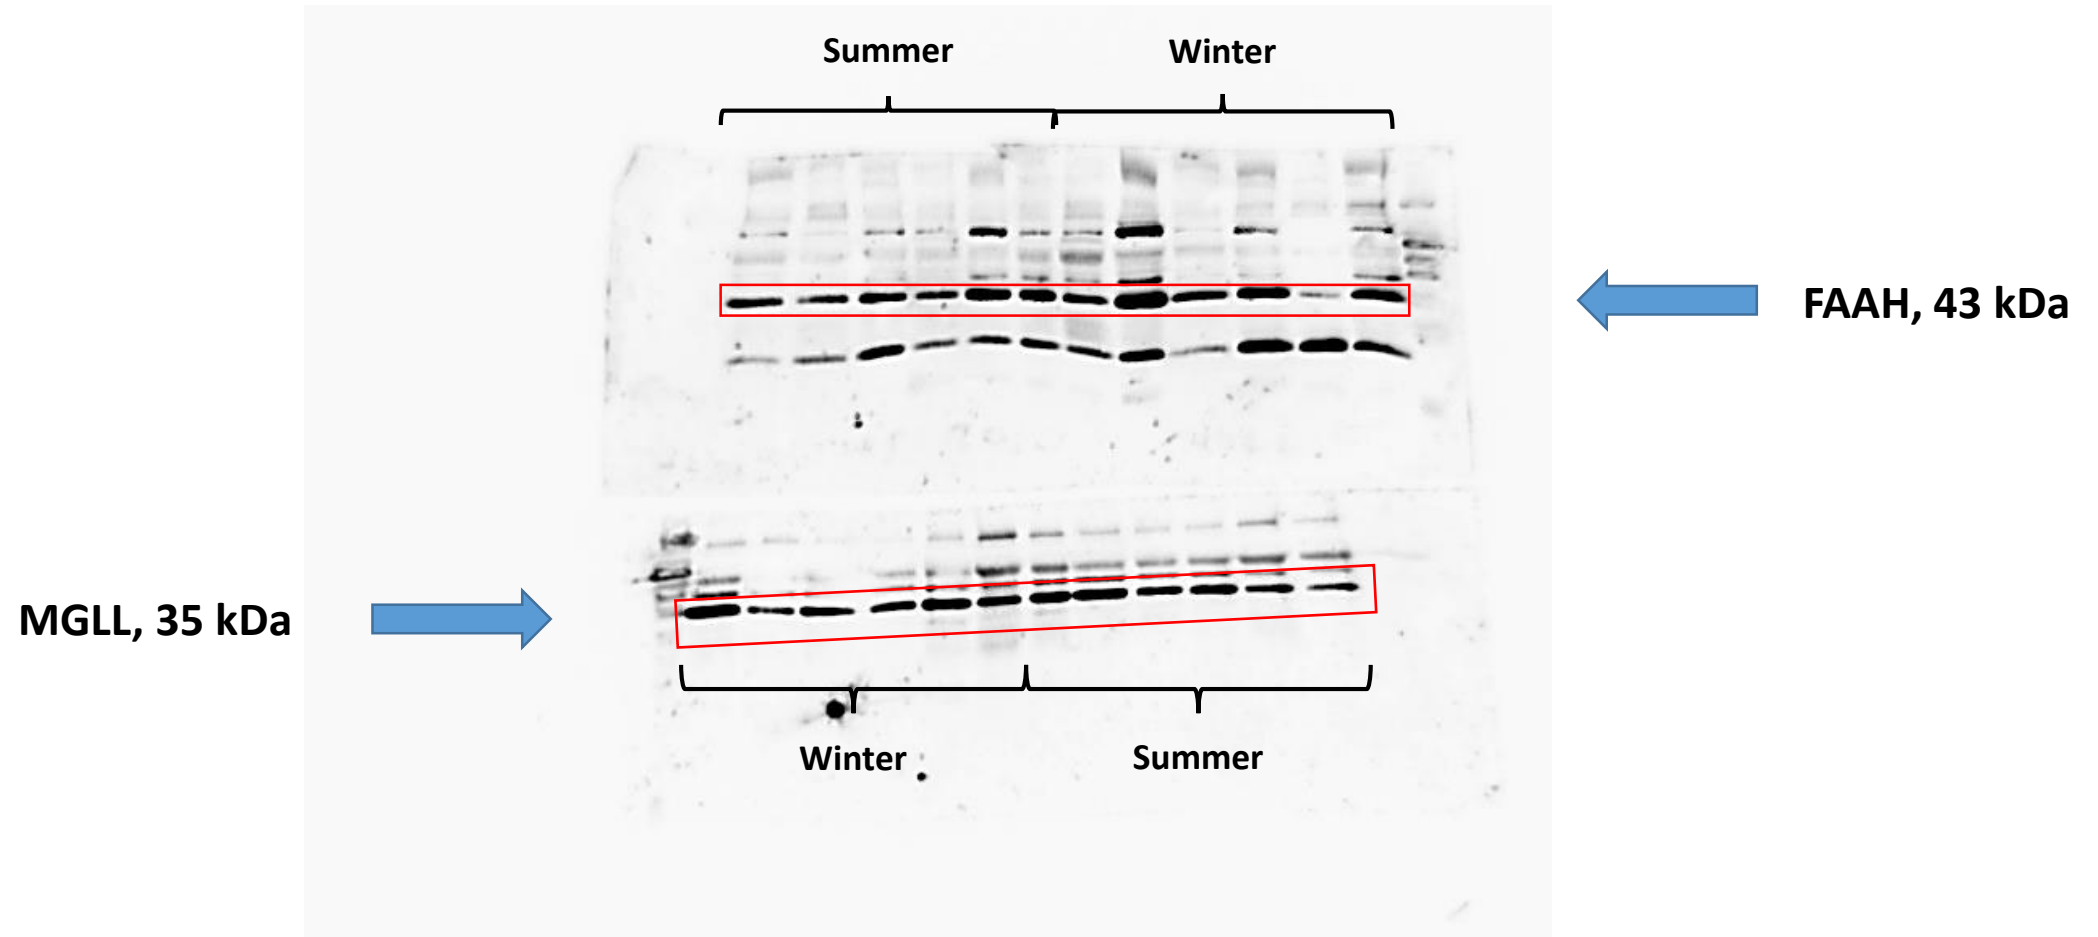

PPAR $\alpha$  protein Cooled vs. not cooled (shown in fig 3)

52 kDa

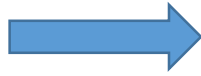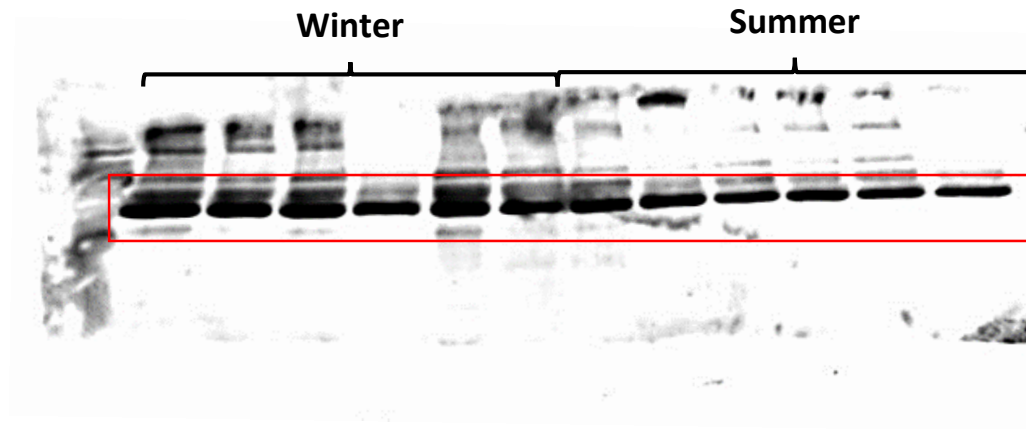

Actin number 2 Cooled vs. not cooled (shown in fig 3)

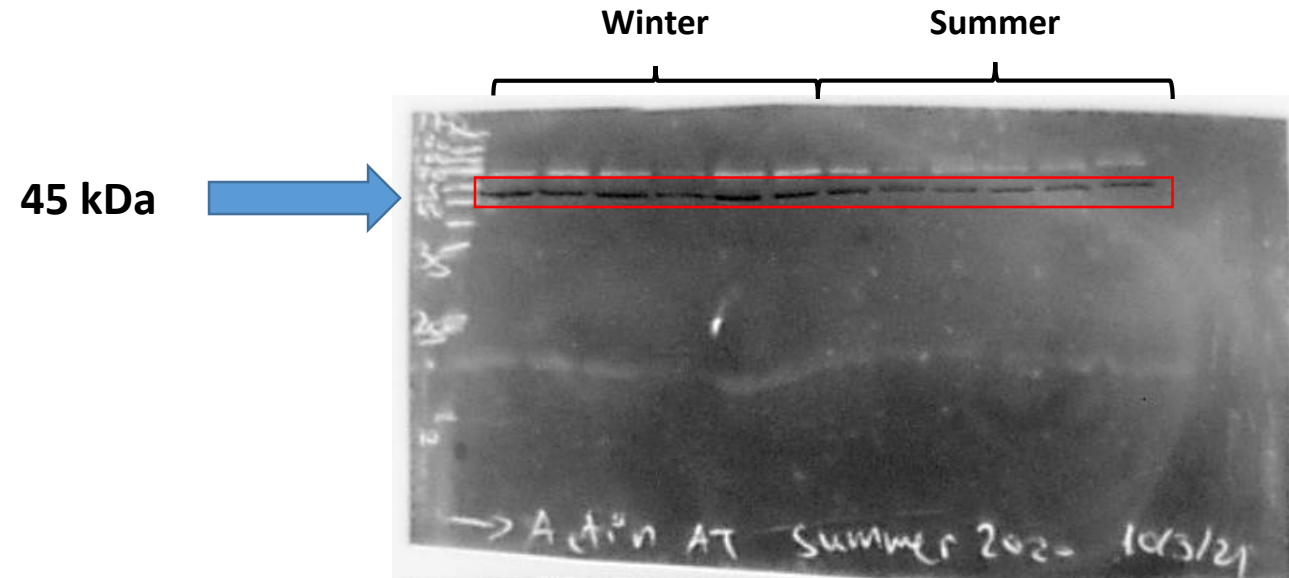

TNF $\alpha$  protein Cooled vs. not cooled (Shown in fig 4)

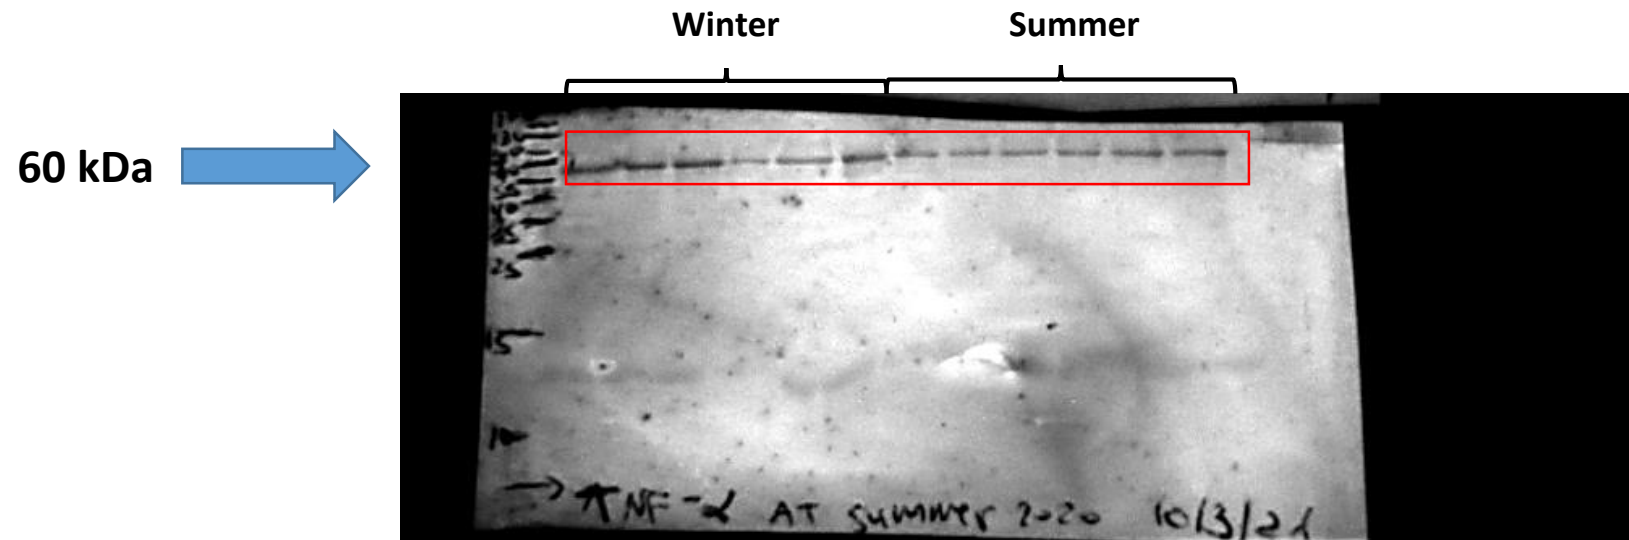



Actin number 1 and TRPV1 proteins Cooled vs. not cooled (shown in Fig 4)

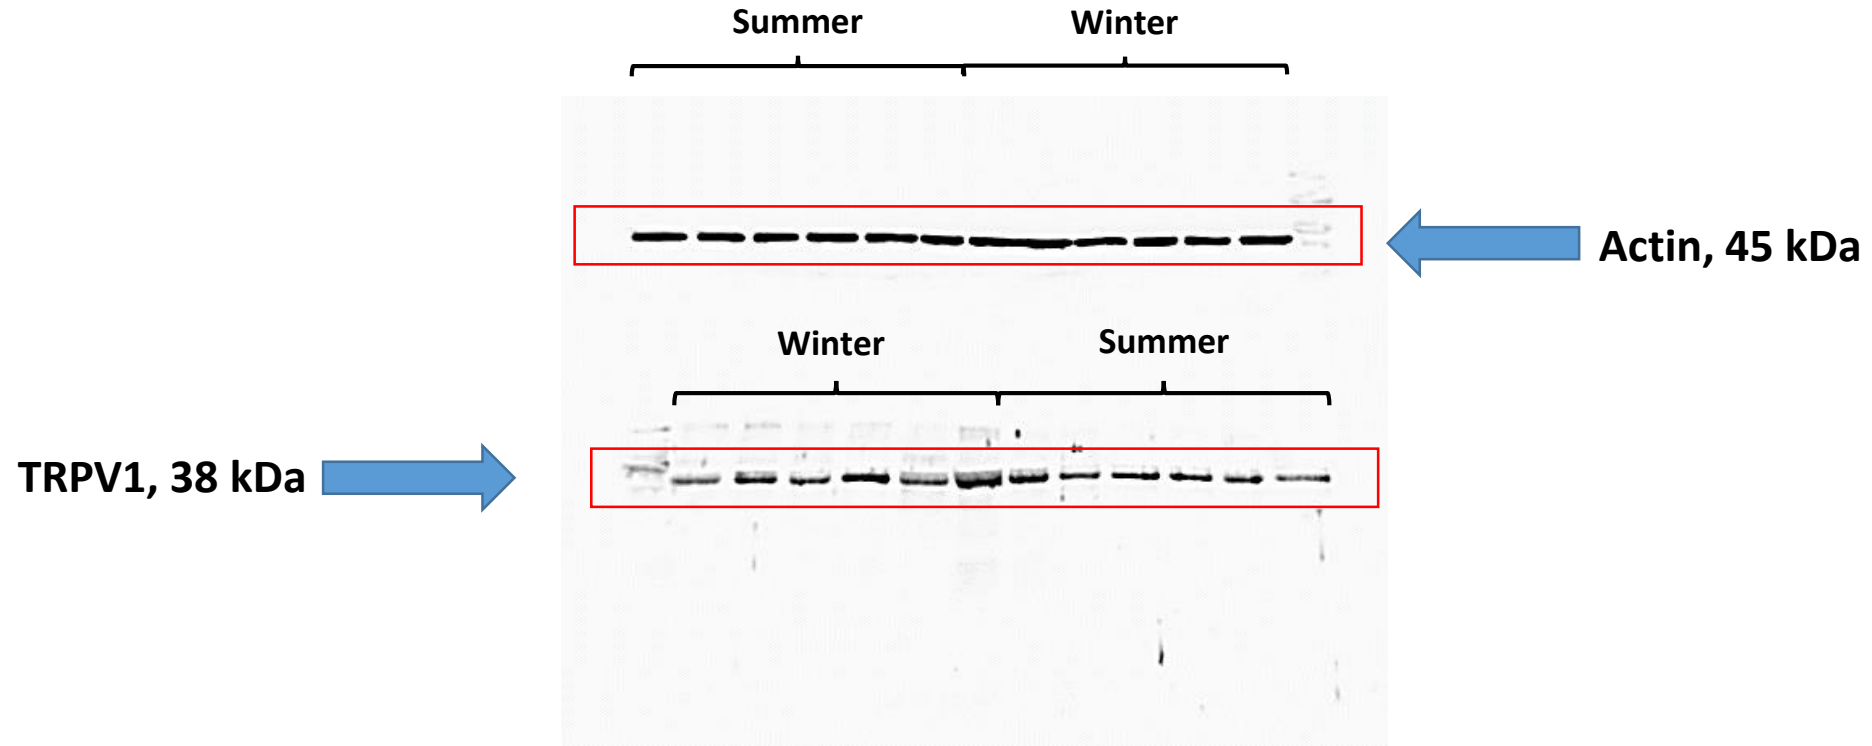

Supplement: s1 [file s1]
